# Supplementary material for: Polyvinyl alcohol as solid proton donor to modify g-C 3 N 4 via hydrogen bonding enabling efficient photocatalytic H 2 O 2 production from H 2 O and O 2
Source: Royal Society of Chemistry journal article supplement (doi:10.1039/d4ra01746c), 2024-01-01
Supplement: d4ra01746c1.pdf [file d4ra01746c1.pdf]

## Supporting Information

### **Polyvinyl alcohol as solid proton donor to modify g-C<sub>3</sub>N<sub>4</sub> via hydrogen bonding enabling efficient photocatalytic H<sub>2</sub>O<sub>2</sub> production in H<sub>2</sub>O and O<sub>2</sub>**

Chen Chen<sup>a#</sup>, Fengtiao Liao<sup>#b</sup>, Xiangcheng Zhang<sup>c</sup>, Silian Cheng<sup>c</sup>, Yu Deng<sup>a</sup>, Chao  
Chen<sup>b\*</sup>, Mingce Long<sup>c</sup>

<sup>a</sup> *CCCC Shanghai Dredging Co., Ltd. No. 850, Pudong Avenue, Pudong New Area, Shanghai, 200120, China*

<sup>b</sup> *Shanghai Engineering Research Center of Biotransformation of Organic Solid Waste, Shanghai Key Lab for Urban Ecological Processes and Eco-Restoration, School of Ecological and Environmental Sciences, East China Normal University, Shanghai, 200241, China*

<sup>c</sup> *School of Environmental Science and Engineering, Key Laboratory of Thin Film and Microfabrication Technology (Ministry of Education), Shanghai Jiao Tong University, Shanghai 200240, China*

**\* Corresponding Author**

E-mail for Chao Chen: [cchen@des.ecnu.edu.cn](mailto:cchen@des.ecnu.edu.cn)

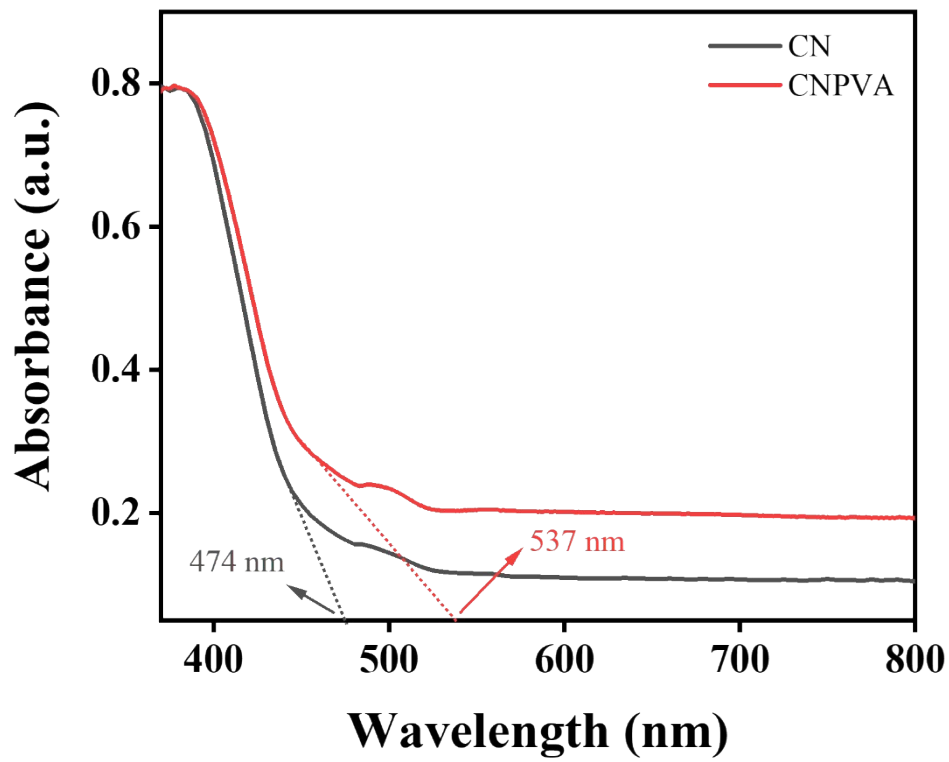

Figure S 1 UV-vis spectra of CN and CNPVA.

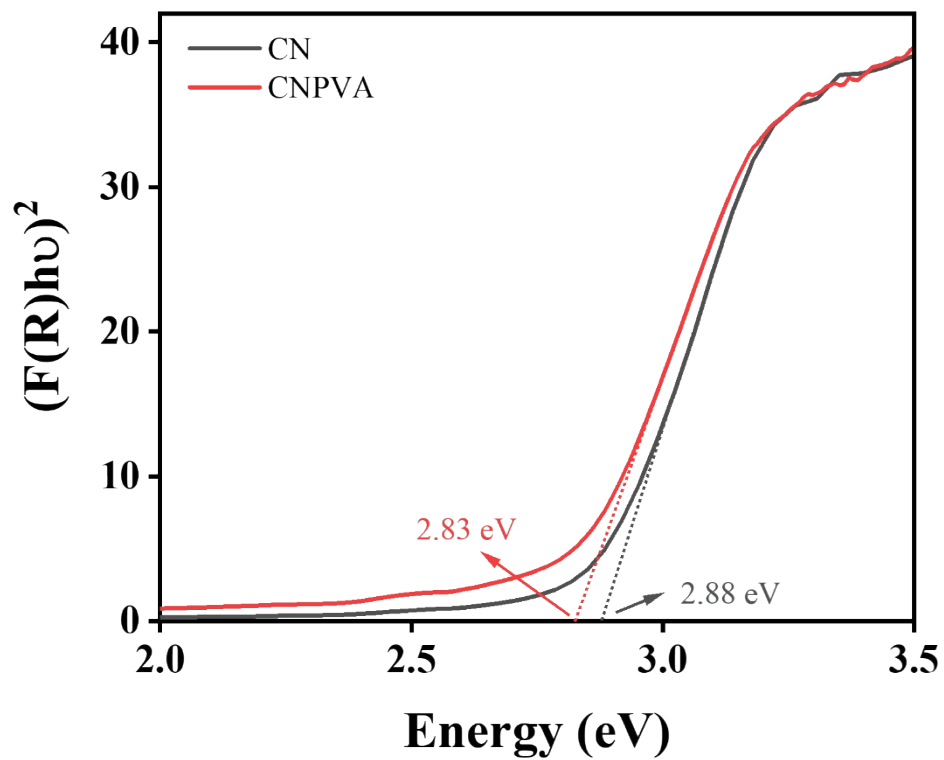

Figure S 2 Tauc plots of CN and CN/PVA.

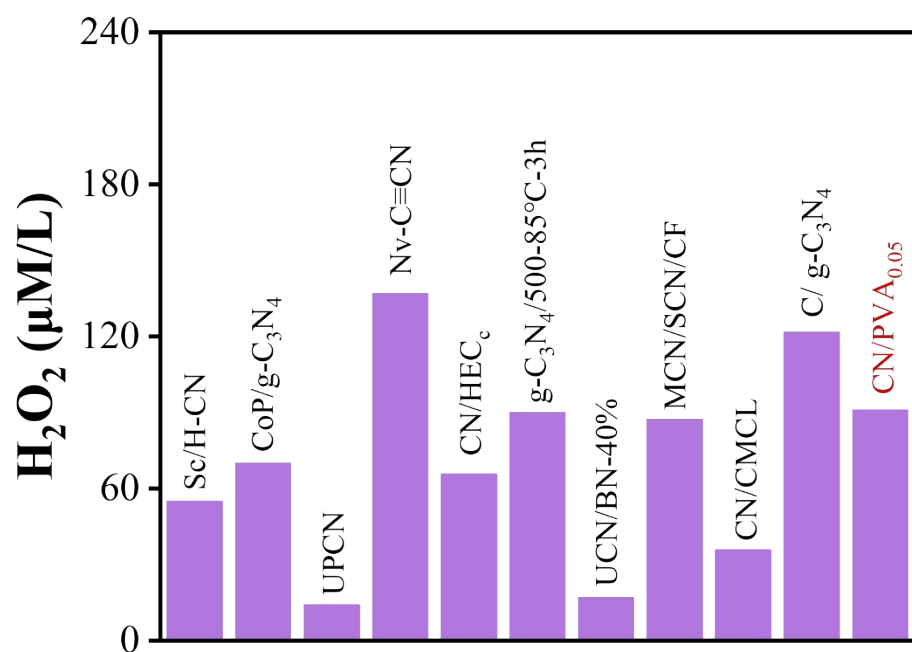

Figure S 3 A comparison of photocatalytic H<sub>2</sub>O<sub>2</sub> production rates for g-C<sub>3</sub>N<sub>4</sub> related photocatalysts. <sup>1-10</sup>

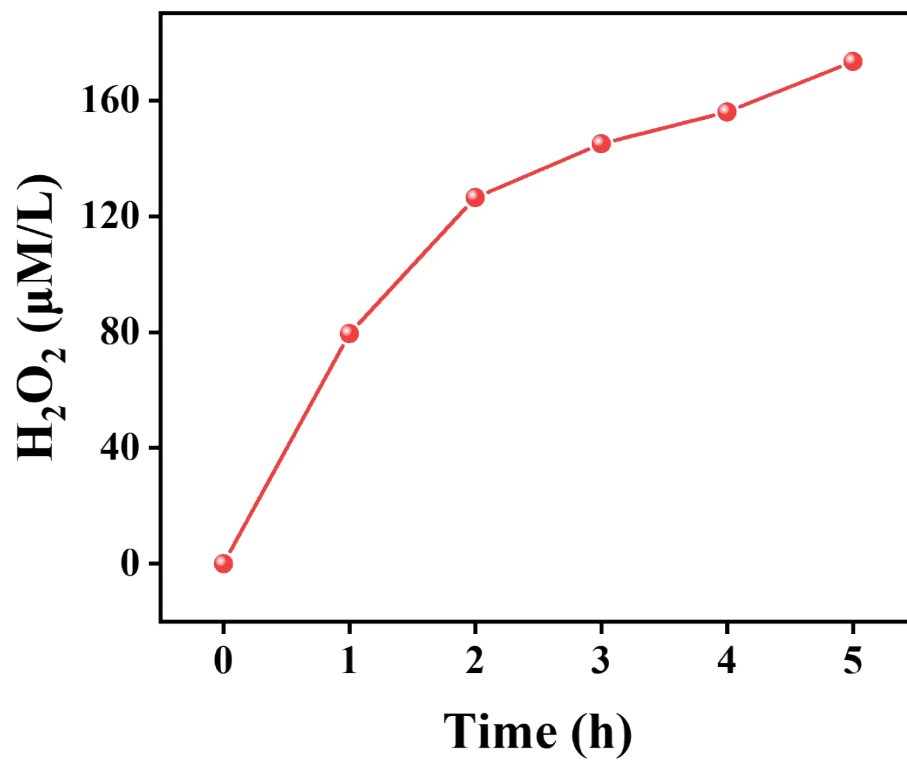

Figure S 4  $\text{H}_2\text{O}_2$  photosynthesis of CN/PVA in a prolonged test.

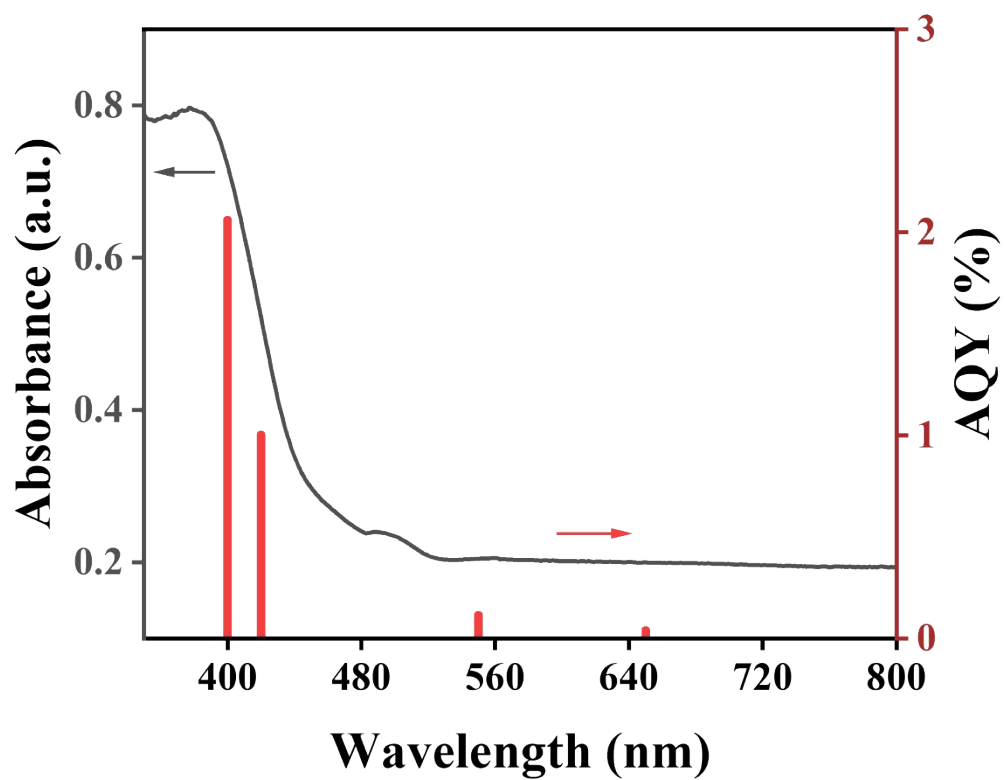

Figure S 5 Wavelength dependence of AQY for  $\text{H}_2\text{O}_2$  production over CN/PVA under monochromatic light irradiation.

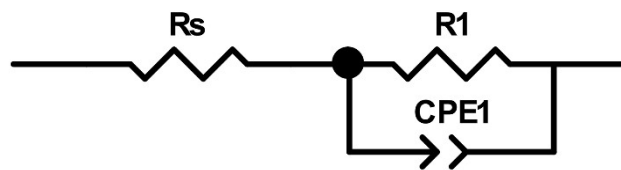

Figure S 6 Equivalent circuit diagram simulation of electrochemical impedance spectroscopy nyquist.

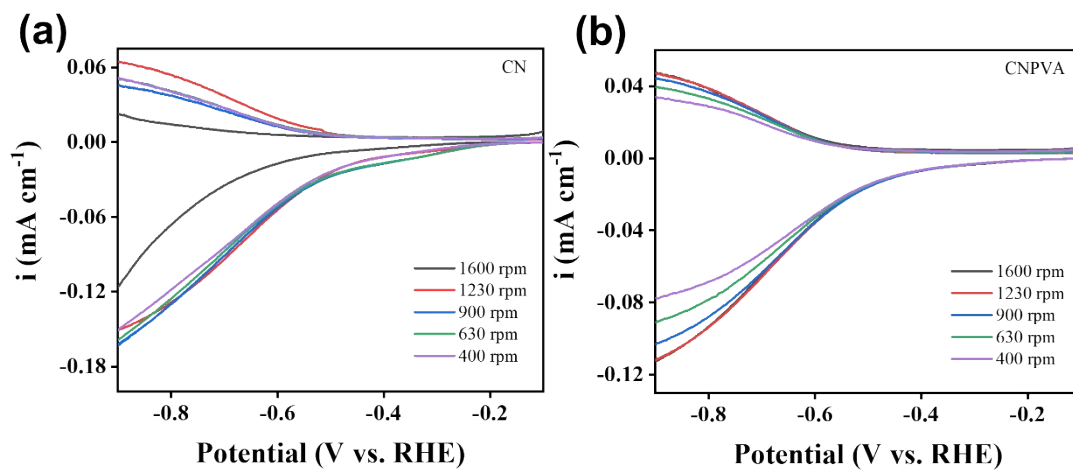

Figure S 7 LSV curves of the photocatalysts on RRDE in O<sub>2</sub>-saturated 0.1M Na<sub>2</sub>SO<sub>4</sub> at different rotating speeds.



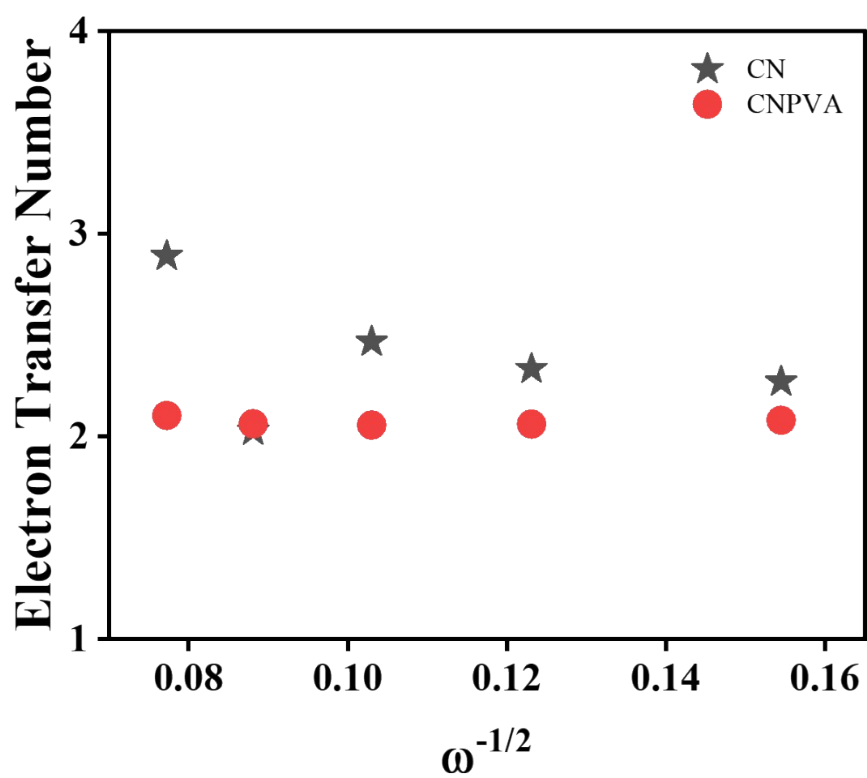

Figure S 8 Electron transfer number of CN and CNPVA at different rotating speeds.

1. S. Yao, T. Tang, Y. Shen, F. Yang and C. An, *Science China Materials*, 2022, **66**, 672-678.
2. Y. Peng, L. Wang, Y. Liu, H. Chen, J. Lei and J. Zhang, *European Journal of Inorganic Chemistry*, 2017, **2017**, 4797-4802.
3. W. Shi, W. Sun, Y. Liu, K. Zhang, H. Sun, X. Lin, Y. Hong and F. Guo, *J Hazard Mater*, 2022, **436**, 129141.
4. X. Zhang, P. Ma, C. Wang, L. Gan, X. Chen, P. Zhang, Y. Wang, H. Li, L. Wang, X. Zhou and K. Zheng, *Energy & Environmental Science*, 2022, **15**, 830-842.
5. P. Zhang, J. Zhang, D. Wang, F. Zhang, Y. Zhao, M. Yan, C. Zheng, Q. Wang, M. Long and C. Chen, *Applied Catalysis B: Environmental*, 2022, **318**, 121749.
6. B. Liu, J. Du, G. Ke, B. Jia, Y. Huang, H. He, Y. Zhou and Z. Zou, *Advanced Functional Materials*, 2022, **32**.
7. X. He, H. Shang, C. Wang, L. Chen, Z. Gong, J. Wang, S. Zhao and J. Ma, *Chinese Chemical Letters*, 2021, **32**, 3377-3381.
8. J. Zhou, T. Shan, F. Zhang, B. Boury, L. Huang, Y. Yang, G. Liao, H. Xiao and L. Chen, *Advanced Fiber Materials*, 2024, **6**, 387-400.
9. T. Shan, J. Li, S. Wu, H. Wu, F. Zhang, G. Liao, H. Xiao, L. Huang and L. Chen, *Chemical Engineering Journal*, 2023, **478**.
10. J. Zhou, T. Shan, H. Luo, B. Boury, X. Xu, H. Wu, F. Zhang and H. Xiao, *Journal of Environmental Chemical Engineering*, 2023, **11**.
